# Supplementary material
Source: PubMed Central journal article supplement (PMC1142408)

Clone 1  
GGAAT CGAAT GGAAT CACC AAAAAAAAAAAAAAAAAAAAAAAAAAAAAA

Clone 2  
CTATGGCC GGAAT CAGC GGAAT AAATATTTAAATTTGTATAATAA

Clone 3  
GGGGGAGGGACAT GGAAT CAACCCGAGT T GGAAT GACAT GGATT GGAAT CGAATC AAAAAACATAAAAAACTTTAAAAA AAAAAA

Clone 4  
GGATA GAAT GGAAT CAACCAGAGT GGAGT GGAAT GGAAA GGAAT  
CAACTCGAGT GCAAT GGAAT GGAAT GGAAT GGAAT GGAAC GGAAT GGAAT GAACC AAAAAAAAAAAAAAAAAAAAAAAAAAAAAA

Clone 5  
GGAAT GGAAT TAAAT GGAAT GGAAA GGAAT GGAAT CAACCCGAGT GGAGG GGAAT GGCAT GGATT GGAAT GGAAT GGAAT  
ACAACAAAAT GGAAA CAACACGAGT AGAAT GGCAT GGAAT GTAAA GGAAT TGAATATAAT GGAAT GGAGT GGAAT GGAAT  
AAACACCAAGT GGAAT GAAAT GGAAA AAAAAACAAAAAAAAAAAAAAAAAAAAAAAAAAAAA

Clone 6  
GGGT GGAAT GGAAT GTAAA GGAAT GGAGT GGAAT TCAAT AGAAT CATCCCGAGT GGAAT GGCAT GGATT GGAAT GGAAT GGAAT  
GGAAT GGAAT GGAAT CAACCCGAGT T ACAGG GGAAT  
GGCAT GTAAT AAACA GGATT GGAAT GG AAAAAAAAAAAAAAAAAAAAAAAAAAAAAAAAAAAAAAAAAAAAAAAAAAAAAAAAAAAAAAAAAA  
AAAAAAAAAAAAAAAAAAAAAAAAAAAAAAAA

Clone 7  
GGAAT GGAAC GGAAT TGATT GGAAT GGAAA GGAAA AGAAT GGAAT GGAAT CAGAA GGAAC AGAGT GGAAT GGCAT GGATT GGAAT  
GGAAT GGAAT GGAAT CAACCCGAGT T ACAGG GGAAT GGAAT GGAAT GGAAT GCAAT GGAAT GGAAT CATCC GTAAT GGAAT  
GGAAA GGAAT GGAAT GGAAT GGAAT GGAGT GGAAT GGAAT GGAAT CAACTCGATT GCAAT CGAAT GGAAT GGAAT GGAAT  
TAACC AAAAAAAAAAAAAAAAAAAAAAAAAAAAAA

Clone 8  
GGGGCGTGGAGCCGGCGTGGAT GGCAT GGATT GGAAT GGAAT GGAAT GAAAT CAACCCGAGT TACAGG GGAAT GGAAT GGAAT  
GGAAT GCAAT GGAAT GGAAT CATCCGTAAT GGAAT GGAAA GGAAT GGAAT GGAAT GGAAT GGAAT GGAAT GGAAT GGAAT  
A GGAAT GGAAT GGAC GGAAT GGAAT GGAAT GGAAT GGAAT CGAAT GGAAT GGAAT GGAAT GGAAT CACT CGAAT GCAAT CGAT  
GGAAT GGAAT GGAAT AACCCAAAAAGGAAAAAAGGGAAC

Clone 9  
GGAAT GGAAT GGAAT GAAAT GGAAT GGAAT GGAAT GGAAT CAACCCGAGT T GCAAT GGAAT GGATT CTAAT GGAAT GGAAT GGAAT  
GGAAT GGATT CAACAAGAAT GGAAT GGAAA GGAAT AGAGT CAACCCGAGT T GGAAT GGCAT GGATT GGAAT TGAAT GGAAT GGAAT  
CAACCCGAGT TACAGC GGAAT GGAAT GGAAT GGAAT GCAAT GGAAT GGAAT CATCC GTAAT GGAAT GGAAA GGAAT GGAAT GGAAT  
GGAAT GGAAT GGAAT GGAAT GGAAT GGAAT GAAAT GGAAT GCAAT GGAAT ATAATCAACCCGG AAAAAAAAAAAAAA  
AAAAAAAAAAAAAAAA

Clone 10  
GGAAT GGCAT GGATT GGAAT GGAAT GGAAT GGAAT GGAAT GCAAT GAACCCGATG CAAT GGAAT GGAAT GGAAT GGAAT GGAAT  
GGAAA CATCCCGAAT GGAAT GTAAT GTAAT GGAGT GTAAG GGGAT TGAAT AGAAT AAATCCGAAT GTAAT GGAAT GGAAT GGAAT  
GGAAT CAACCCGAGT GCAAT GGAAT GGATT CGAAT GGAAT GGAAT GGAAT GGAAT GGATT CAACAAGAAT GGAAT GGAAA GGAAT  
GGAAT CAACCCGAGT GTAAT GGCAT GGAAT GGAAT GCAAT GGAAT GGAAT CAACCCGAGT ACAAG GGAAT GGAAT GGAAT GGAAT  
GCAAT GGAAT TGAATCATCC GTAAT GGAAT GGAAA GGAAT GGAAT GGAAT GGAAT GGAAT GGAAT GGAAG GGAAT GGAAA  
AAAAAAAAAAAAAAAAAAAAAAAAAAAA

Clone 11  
GGAAT GGAAT GGAAT GGAAT GGAAT GGAAT CAAACCCGAGT GTAAT GGAAT GGAAT GGAAT GGAAT GGAAT AGAAT AGAAT AGAAT  
TGAAT CAAGGCGAGT GGAAT GCAAT GGAAT GGAAT CATCC GTAAT GGAAT GGAAT GGAAA GGAAT GGAAT GGAAT GGAAT GCAGT  
GGAAT GGAAT CAACCCGAGT TACAAT GGAAT GGAAT GGAAT AGAAT GGAAT GGAAT GGAAT GATAC GGAAT AGAAT GGAAT GGAAC  
GAAAT GGAAT  
GGAAA GGAAT GGAAT CAACCCGAGT GGAAT GGAAG GGAAT GGAAT GGAAT GGAAA CTAAT AGAAAAAAAAAAAAAAAAAAAAA  
AAAAAA

Clone 12  
GGAAT TGAAT AGAAT CAATCCGAAT GGAAT GGAAT GCAGT GGAAC GGAAT GTAAT GTAAT GTAAT GGAAT GGAAT CAACCCGAGT  
GCAGG GGAAT GGAAT GTAAT GGAAT GCAAT GGAAT GGAAT CATCC GTAAT GGAAT GGAAT GGAAT GGAAT GGAAT CACTTCGAGT  
GCAAT GGAAT GGAGT GGAAT  
AGAAT CAATCTGAAT GTAAA GAAAT GCAAT GGAAC GGAAT TGAAT GGAAT GGAAT GGAAT GGAAT GGAAT GCAAT GTAAT GGAAT  
CAACCCGAGT GCAAT CGAAT GGAAT GGAAT GGAAT GCAAT GGAAT GGAAT GGAAT GGAAT GGAAT GGAAT GGAAT GGAAT  
GGAAT GGAAT GGAAC GGAAC AGAAC AAAAAAAAAAAAAAAAAAAAAAAAAAAAAA

Clone 13  
CGAAT GGAAT GGAAT GCAAT GGGAT GGATT CAACTTGAAT GGAAT GGAAT GGAAT GGAAT GGAAT GGAAT GGAAT GGAAT GGAAT  
GGAAT GGAAT GGAAT GGAAT CAACCCGAGT ACAGG GGAAT GGAAT GGAAT GCAAT GGAAT GGAAT CATCCGTAAT GGAAT  
GGAAA GGAAT GGAAT GGAAT GGAAT GGAAT GGAAT GGAAT GCAAT GGAAT CAACTTGAAT GCAAT CGAAT GGAAT GGAAT GGAAT  
TAACACGAAT AGAAT GGAAT GGAAA GGAAT GGAAC GGAAC GGAAT GGAAT GGAAT GGAAT GGAAT GGAAT GGAAT GGAAT GGAAT  
GGAAT GGAAT GGAAT GGAAT GGAAT CAACGCGAGT GCAGG GGAAT GGAAT GGAAT GGAAT GGAAT GGAAT GGAAT GGAAT  
GGAAT GGAAT GGAAT GGAAT GGAAT GAAAT GCAAT GGATT CAACTCG AAAAAAAAAAAAAAAAAAAAAAAAAAAAAA

Clone 14  
GGG GGAAT GGAAT CAACACGAGT GGAAT GGCAT GGATT GGAAT GGAAA GGATT CAACCCGAGT T GCAAT GTAAT GGATT GGAAT  
GCAGT GGAAT GGAAT GGAAT GGAAT GGAAT GGAAT GGAAT GGAAT CAACACAAAAT GGAAT GGAAT GGAAT GGAAT AGAAT  
GGAAA GGAAT GGAAT GCAAT GGAAT GGAAT GGAAT GGAAT GGAAT AAACCCGAAT GGAAT GGAAT GGAAT GGAAT GGAGT  
GGAAT GGAAT AAACCT CCAAT GGAAT GAAAT CGAAT GGAAT GAAAT GGAAT GGAAT GGAAT CAACCCGAGT T AGAAT GGAAT  
GGAAT GGAAT GGAAA GGAAT GGAAT GGAAT GCAAT CAACT GGCAT GGAAT GAAAT GGAAT GGAAT GGAAT GGAAT GGAAT  
CGAAT AGAAT CACTCGAGT GGAAT GGAGC GTAAT GAAAT TGACT GACC GCAAT GCAT TGAAA GAACAGAA  
unfinished sequence

Clone 15  
GGAAT GGAAT GGAAT GGAAT GGAAT CAAACCCGAGT GTAAT GGAAT GGAAT GGAAT GGAAT GGAAT GGAAT GGAAT GGAAT  
GGAAG GGAAT GGAAT GGAAT AGAAT GGAAT GGAAT GGAAT GTACTGGAGT GCAAG GGAAT GGAAT GGAAT GGAAT GCAAT GGAAT  
GGATT CAACT TGAAT GGAAT GGAAA GAAT GGAAT CAACACGAGG GGAAT GGCAT GGATT GGAAT ACAAC GGAAT GGAAT GGAAT  
GGAAT GGAAT GGAAT GCAAT GGAAT GGAAT CAACCCGAGT TACAAT GGAAT GGAAT GGAAT GGAAT GGAAT GGAAT GGAAT GGAAT  
GGAAT AGAAT GGAAT GGAAC GAAAT GGAAT  
GGAAT GTATT CGAGT GGAAT GGAAA GGAAT GGAAT CAACC AGAGT GGAAT GGAAG GGAAT GGAAT GGAAT GGAAA CTAAT AG  
AAAAAAAAAAAAAAAAAAAAAAAAAAAA

Clone 16  
GGAAT GGAAC AGAAT GGAAC GGAAT TGAAT GGAAT  
AGAAT GGAAT GGAAC GAAT GTAAT GGAAT GGAAT TGAAT GGAAT GGAAT GGAAT CAACGCGAGT GCAGG GGAAT GTAAT  
GGAAC GGAAT GCAAT GGAAT GGAAT CATCC GGAAT  
CAACCCGAGT GCAAT GGAAT GGAGT GGAAT GGAAT GGAAT GGAAC AACCCAAAT GGAAT GGAAT GTAAT GGAGA GTAAG  
GGAGT TGAAT AGAAT CAATCCGAAT TGAAT GGAAT GGAAT GCAAC GGAAT GGAAT GGAAT GGAAT GGAAT GGAAT GGAAT GGAAT

GGAAT CAACCCGAGT ACAAT GGAAT GGAAT GGAAT GGAAT GGAAT GGAAT GGAAT GATAC GGAAT AGAAT GGAAT GGAAC GAAAT  
GGAAT GGAAT GGAAT GGAAT GGAAT CGTTC CGAGT GGAAT AGGAGGG AAAAAAAAAAAAAAAAAAAAAA

Clone 17

GGAAT GGCAT GGATT GGAAT GGAAT GGAAT GGAAT GGAAT GCAAT GAACCCGATG CAAT GGAAT GGAAT GGAAT GGAAT GGAAT  
GGAAA CATCCCGAAT GGAAT GTAAT GTAAT GGAGT GTAAG GGGAT TGAAT AGAAT AAATC CGAAT GTAAT GGAAT GGAAT GGAAT  
GGAAT CAACCCGAGT GCAAT GGAAT GGATT CGAAT GGAAT GGAAT GGAAT GGATT CAACAAGAAT GGAAT GGAAA GGAAT  
GGAAT CAACCCGAGT GTAAT GGCAT GGAAT GGAAT GGAAT GGAAT GGAAT GGGAT GGAAT GGAAT GTTAC GGAAT AGAAT GGAAT  
GGAAT GAAAT GGAAT GGAAT TTAAT GGAAT GGAAT GGAAT GAACCCGTGT GCAAT GTAAT GGAAT GGAAT GGAAT GGAAT  
GTATT CAACTCGAAT GGAAT CAACTCGATT GCAAT GGAAT GGAAT GGAAT GGAAA GGAAT AGAAT GGAAT CAACCCAAGT GGAAT  
GGAAA GGAAA GGAAT  
GCAAT GGAAT TGAAT CATCCGTAAT GGAAT GGAAA GGAAT GGAAT GGAAT GGAAT GGAAT GGAAT GGAAG GGAAT GG  
AAAAAAAAAAAAAAAAAAAAAAAAAAAA

Clone 18

GGAAT GGAAT GGAAT CAAACCGAGT GTAAT GGAAT GGAAT GGAAT GGAAT GGAAT AGAAT AGAAT AGAAT TGAAT CAAGCGAGT  
GGAAT GCAAT GGAAT GGAAT CATCC GTAAT GGAAT GGAAT GGAAA GGAAT GGAAT GGAAT GGAAT GGAAT GGAAT AGAGT GGAAT  
GGAAT CAACT CGATT GCAAT CGAAT GGAAT GGAAT GGAAT TAACCCGAAT AGAAT GGAAT GGAAT GGAAT GGAAC GGAAC GGAAT  
GGAAT GGAAT GGAAT GGAAT GGAAT GGAAC GGGAA GGAAG GGAAT GGAAT GGAAT AGAAT GGAAT GGAAT GGAAT CAACCGAGT  
GCAGG GGAAT GGCAT GGATT GGAAT GCAAT GGAAT GGATT CAACTT GAAT GGAAT GGAAA GAAT GGAAT CAACACGAGG GGAAT  
GGCAT GGATT GGAAT ACAAC GGAAT GGAAT GGAAT GGAAT GGAAT GGAAT GGAAA GGAAT GGAAT CAACCCGAGT T ACAAT GGAAT  
GGAAT GGAAT AGAAT GGAAT GGAAT GGAAT GATAC GGAAT AGAAT GGAAT GGAA CGAAT GGAAT GGAAT GGAAT GGAAT GGAAT  
GGAAT GGAAT GGAAT CGTTCCGAGT GGAAT AGGAG GGAAT GTATTGAGT GGAAT GGAAA GGAAT GGAAT CAACCCGAGT GGAAT  
GGAAG GGAAT GGAAT GGAAT GGAAA CTAAT AG AAAAAAAAAAAAAAAAAAAAAAAAAAAAAA

Clone 19

GGAAT GGAAT GGAAT GGAAT GCAAT GGCAC GGAAC GGAAT GTAAT GGAAT GGAAT GGAAT GGAAT GGAAT GGAAT CAACCCGAGT  
GGAAT GGAAT GGAAT GGAAT CAAACTGAGT GGAAT GGAAT GGAAT GGAAA GGAAT GGAAT GTAAT GCAAT GGAAT GGAAT GGAAT  
CAACT GGAAT GGAAT GGAGT GGAAT GGAAT GGAAC CAACGCCAGT GGAAT GGAAT GGAAT GGAAT GGATA ATAT GGAAT GGAAG  
GGAAT CAATCCGGT GAAAT GGAAT GGAAT GGAAT GCAAT GGAAT GGAAT GGAAT CAACT CGAGT GGAAT GGCAT GGATT GGAAT  
GGAAT GGAAT GGAAT GGAA CAATC CGAAT GGAAT GGAAT GTAAT GGAGAGTAAGGGAGTTCAAAAAGAATCAATC CGAAT GTAAT  
GGAAT GGAAC GGAAT GGAAT GGAGT GGAAT GGAAT GGAAT GGAAT GCAAT GGAAT GGAAT CAACCCGAGT TACAAT GGAAT  
GGAAT GGAAT GGAAT GGAAT GGAAT GGAAT GATAC GGAAT AGAAT GGAAT GGAAC GAAAT GGAAT GGAAT GGAAT GGAAT  
GGAT GGAAT GGAAT GGAAT GGAAT GGAAT GGAAT CGTTCCGAGT GGATA GAG GGAAT GTATT CGAGT GGAAT GGAAA GGAAT  
GGAAT CAACCCGAGT GGAAT GGAAG GGAAT GGAAT GGAAT GGAAA CTAAT AGAAT GGAAT CAACCCGAGT T GGAAT GGAAT GGAAA  
GGTAT GGAAT AGAAT GGAAT GGAAT GGAAT CAACT CGATT GTAAT GGAAT GGAAT GGAAT GGAAT GGAAT GGAAT CAACCCGAGT  
TGCAAT GGAAT GGAGT GGAAT GGAAT GGAAT GGAAT GGAA CAACCCGAAT GGAAT GGAAT GTAAT GGAGA GTAAG GGAGT TGAAT  
AGAAT CAATC CGAAT GTAAT GGAAT GGAAT GGAAC GGAAT GGAAT TGAAT GGAAT GGAAT GGAAT GCAAT GGAAT GGAAT  
CAACCCGAGT TGCAAT GGAAT GGAGA GGAAT GGAAT CGAAT GGAAT GGAAA CTACCCGAAT GGAAT GGCAT GGATT GGAAT GGAAT  
GGAAT GGAAT GGAAG AGAAT GGAAT AGAAT GGAAT GGAAT AAATTT GGAT GGAGT GGG AAAAAAAAAAAAAAAAAAAAAAGAAA  
AAAAAAAAAAAAAAAAAAAAAAAAAAAA

Clone 20

GGAAT CAACCCGATT CCAAT GCAAA GGAAT GGAAA GGAAT  
GAACT GAACT GTAAT GGAAT GGAAT GGAAT GTAAT TTAAT GGAAT GGAAT GGAAT CAACCCGAGT T GGAAT GGAAT GGAAT GGAAT  
GGAAA TGAAT GGAAT AGAAT GGAAT GGAAC GGAAC CGAAC CGAAT GAACC CAACCCGAAT GGATT GGATT GTAAT GGAAA TGAAT  
GGAAT GGAAT GGAAT GGAAT GGAAC GGAAC GGAAC GAACC CAACCCGAAT GGATT GGATT GGAAT GGAAT GGAAT GGAAC GGAAC  
GGAAT GGATT GGATT GGAAT GGAAC CGACT GGAAT GGAAT GGAAT GGAAT GGAAT GGAAC CGAAT TGAAT GGAAT GGAAT GGAAT  
GCAAT GCAAT GTAAT GTAGT GGAAT GCAAT GCATT CGACT CAACT GGAAT GGAAT GGAAT GGAAT GGAAT GGAAT GGAAT GGAAT  
GGCAT GGCTT GGATT GCAAT GCATT GGATT GGAAT GGAAT GACTC ACTCGAGT GGAAT GGAT GGAT GGAAT GAAT GGAAT GGAT  
GGAAT CACTCACTCGAGT GGAT GAT GAT GATT GATT GATT GCAT GCAT GAAT GAAT GAT GGAAT GGATCGA  
missing sequence  
CGATCGATGCAT GCAAT GGAAT G GGAAT GGAAT GGAAT GGAAT GGAAG GGAAT GGAAT GGAAT GGAA GGAAT GGAAT GAACT  
GTAATG GAAT GGAAT GGAAT GGAAT TTAAT GGAAT GGAAT GGAT CAACCCGAGT T GGAGT GGAAT GGAAT GGAAT GGAAA TGAAT  
GGAAT AGAAT GGAAT GGAAT GGAAC GGAAC CGAAT GGAAG AACCCGAGT GGAAT GGATT GTAAT GGAAT GAATG GAATA GAAG  
GGAAT GGAAT GGAAT GGAAC GGAAT GGAAC GAACC CGAGT GGAAT GGATT GGAAT GGAAT GGAAT GGAAA GGAAC GGAAT  
GGAAT GGATT GGAAT GGAAT CAACC CGAGT GGAAT GGAAT GGAAT GGAAT GGAAT CAACTGAGT GGAAT GGAAG GGAAT GGAAT  
GCAAT GGAAT GTAAT GGAGT GGAAG GCATTT GAATCAACT GGAAT GGAAT GGAAT GGAAT GGAAT GGAAT CAACCCGAGT GGAAT  
GGCAT GGATT GGAAT GCAAT GGATT GGAAT GGAAT GGAAT CAACTCGAGT GGAAA GGAAT GGAAT GGAAT GGAAT GGAAA GGAAT  
GGAAT GAAGT CAACT CGAGT GGAAT GGAAT GGAAT GGAAT GGATT GGAAT GGATT GCAAT GGAAT GAAAT GGAAT GGAAT GGAAT  
GGAAT CAATC ATTCCGAGT GGAAT GGAAG GGAAT GTAAT GGAGT GGAAA GAAGAGAAT GGAAT AAACCCGAGT GGAAT GCAAGGC  
AAAAAAAAAAAAAAAAAAAAAAAAAAAA



Group B alignment

```
11 GGAATGGAATGGAATGGAATGGAATCAAACCGAGTGTAATGGAATGGAATGGAAT
18 -----GGAATGGAATGGAATCAAACCGAGTGTAATGGAATGGAATGGAAT
15 GGAATGGAATGGAATGGAATGGAATCAAACCGAGTGTAAT-----

11 GGAATGGAATAGAATAGAATAGAATTGAATCAAGGCGAGTGGAATGCAATGGAATGGAAT
18 GGAATGGAATAGAATAGAATAGAATTGAATCAAGGCGAGTGGAATGCAATGGAATGGAAT
15 -----

11 CATCCGTAATGGAATGGAATGGAAGGAAT-----
18 CATCCGTAATGGAATGGAATGGAAGGAATGGAATGGAATGGAATGGAATGGAATAGAGT
15 -----

11 -----
18 GGAATGGAATCAACTCGATTGCAATCGAATGGAATGGAATGGAATTAACCCGAATAGAAT
15 -----

11 -----
18 GGAATGGAATGGAATGGAACGGAACGGAATGGAATGGAATGGAATGGAATGGAATGGAAC
15 -----GGAATGGAATGGAATGGAATGGAATGGAATGGAATGGAATGGAAC

11 -----
18 GGAAGGAAGGGAATGGAATGGAATAGAATGGAATGGAATGGAATCAACCGAGTGCAAG
15 GGAAGGAAGGGAATGGAATGGAATAGAATGGAATGGAATGGAATGTACTGGAGTGCAAG

11 -----
15 GGAATGGAATGGATTGGAATGCAATGGAATGGATTCAACTTGAATGGAATGGAAGGAATG
18 GGAATGGCATGGATTGGAATGCAATGGAATGGATTCAACTTGAATGGAATGGAAGGAATG
19
11 -----GGAATG
15 GAATCAACACGAGGGGAATGGCATGGATTGGAATACAACGGAATGGAATGGAATGGAATG
18 GAATCAACACGAGGGGAATGGCATGGATTGGAATACAACGGAATGGAATGGAATGGAATG
19 333nt - GGAATGGAATGGAATG
16 368nt - TGAATGCAACGGAATGGAATGGAATGGAATGGAATGGAATGGAAT

11 GAATGGAATGCAGTGGAAATGGAATCAACCCGAGTACAATGGAATGGAATGGAATAGAAT-
18 GAATGGAATGCAGTGGAAATGGAATCAACCCGAGTACAATGGAATGGAATGGAATAGAAT-
15 GAATGGAATGCAGTGGAAATGGAATCAACCCGAGTACAATGGAATGGAATGGAATAGAAT-
19 GAATGGAATGCAGTGGAAATGGAATCAACCCGAGTACAATGGAATGGAATGGAATGGAATG
16 GAATGGAATGCAGTGGAAATGGAATCAACCCGAGTACAATGGAATGGAATGGAATGGAAT-

11 ----GGAATGGAATGGAATGATACGGAATAGAATGGAATGGAACGAAATGGAATGGAAT-
18 ----GGAATGGAATGGAATGATACGGAATAGAATGGAATGGAACGAAATGGAATGGAAT-
15 ----GGAATGGAATGGAATGATACGGAATAGAATGGAATGGAACGAAATGGAATGGAAT-
19 GAATGGAATGGAATGGAATGATACGGAATAGAATGGAATGGAACGAAATGGAATGGAATG
16 ----GGAATGGAATGGAATGATACGGAATAGAATGGAATGGAACGAAATGGAATGGAATGGAATGGAAT-

11 -----GGAATGGAATGGAATGGAATGGAATGGAATCGTTCAGAGTGGAAATAG
18 -----GGAATGGAATGGAATGGAATGGAATGGAATCGTTCAGAGTGGAAATAG
15 -----GGAATGGAATGGAATGGAATGGAATGGAATCGTTCAGAGTGGAAATAG
19 GAATGGAATGGATGGAATGGAATGGAATGGAATGGAATGGAATCGTTCAGAGTGGAAATAG
16 -----GGAATGGAATGGAATGGAATGGAATGGAATCGTTCAGAGTGGAAATAG

11 GAGGGAATGTATTCGAGTGGAAATGGAAGGAATGGAATCAACCCAGAGTGGAAATGGAAGGG
18 GAGGGAATGTATTCGAGTGGAAATGGAAGGAATGGAATCAACCCAGAGTGGAAATGGAAGGG
15 GAGGGAATGTATTCGAGTGGAAATGGAAGGAATGGAATCAACCCAGAGTGGAAATGGAAGGG
19 -AGGGAATGTATTCGAGTGGAAATGGAAGGAATGGAATCAACCCAGAGTGGAAATGGAAGGG
16 GAGGG-polyA

11 AATGGAATGGAATGGAATAATAG-polyA
18 AATGGAATGGAATGGAATAATAG-polyA
15 AATGGAATGGAATGGAATAATAG-polyA
19 AATGGAATGGAATGGAATAATAG-425 nt-polyA
```

A

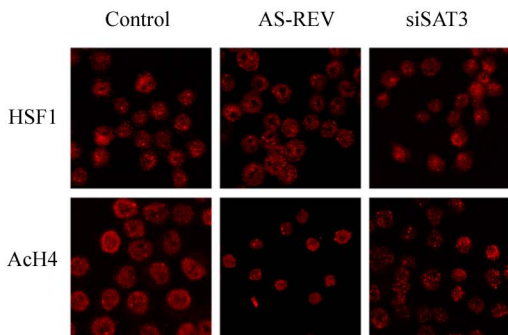

B

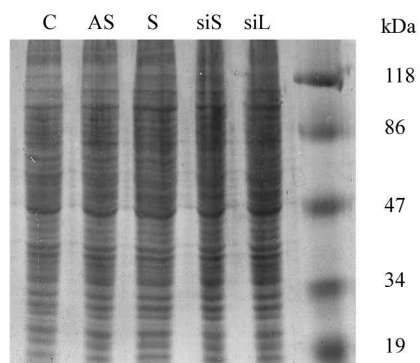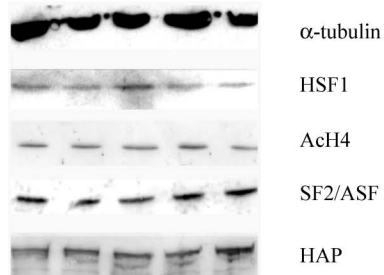

C

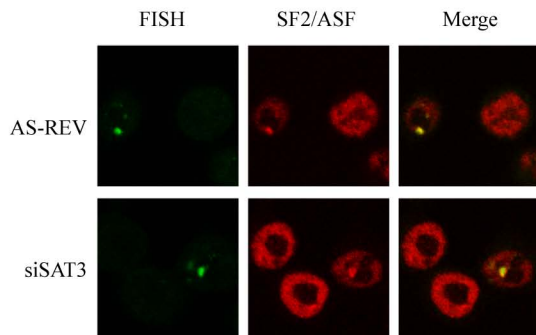

D

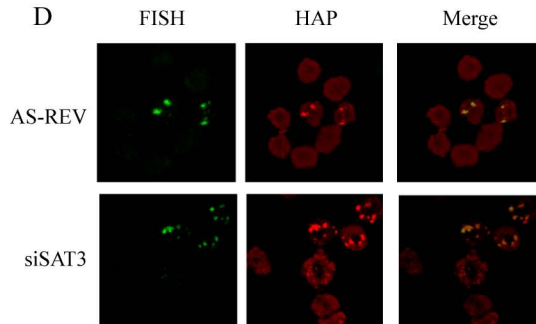

Supplement: mbc_E04-12-1078_1.pdf [file mbc_E04-12-1078_1.pdf]
